# Supplementary material for: Chromosome-level assembly of Gymnocypris eckloni genome
Source: PubMed Central journal article supplement (PMC9346132; doi:10.1038/s41597-022-01595-w), 2022-08-02
Supplement: 41597_2022_1595_MOESM1_ESM.pdf [file 41597_2022_1595_MOESM1_ESM.pdf]

**Supplementary information of Chromosome-level assembly of *Gymnocypris eckloni* genome**

|                                                                                                                               |        |
|-------------------------------------------------------------------------------------------------------------------------------|--------|
| Table s1. Statistics of genome size estimation by 17-mer analysis.                                                            | Page 2 |
| Table s2. Statistics of the chromosome assemblies using Hi-C data.                                                            | Page 2 |
| Table s3. The annotation of repeated sequences in the <i>G. eckloni</i> genome using TRF, RepeatMasker and RepeatProteinMask. | Page 3 |
| Table s4. Summary statistics of repeat annotation in <i>G. eckloni</i> .                                                      | Page 3 |
| Table s5. The number of the annotated non-coding RNA in the <i>G. eckloni</i> genome.                                         | Page 3 |
| Table s6. The comparison of the gene models annotated from the homolog species of <i>G. eckloni</i> .                         | Page 4 |
| Table s7 The number of genes with functional classifications in <i>G. eckloni</i> .                                           | Page 4 |
| Table s8 Gene families among the 14 species.                                                                                  | Page 5 |
| Fig s1. A picture of <i>G. eckloni</i> used in the genome sequencing and assembly.                                            | Page 5 |

**Table s1. Statistics of genome size estimation by 17-mer analysis.**

| <i>Kmer</i> | <i>Kmer number</i> | <i>Kmer Depth</i> | <i>Genome size (Mb)</i> | <i>Heterozygosity</i> | <i>Repeat_rate(%)</i> |
|-------------|--------------------|-------------------|-------------------------|-----------------------|-----------------------|
| 17          | 169,021,371,761    | 181               | 927.13                  | 1.82%                 | 50.5                  |

**Table s2. Statistics of the chromosome assemblies using Hi-C data.**

| <b>Pseudo-Chromosomes</b> | <b>Sequence IDs</b> | <b>Cluster Numbers</b> | <b>Sequences Lengths</b> |
|---------------------------|---------------------|------------------------|--------------------------|
| Chr01                     | Hic_asm_0           | 170                    | 44,161,858               |
| Chr02                     | Hic_asm_1           | 20                     | 25,669,045               |
| Chr03                     | Hic_asm_2           | 102                    | 34,715,927               |
| Chr04                     | Hic_asm_3           | 125                    | 61,913,669               |
| Chr05                     | Hic_asm_4           | 6                      | 28,665,261               |
| Chr06                     | Hic_asm_5           | 66                     | 43,543,958               |
| Chr07                     | Hic_asm_6           | 154                    | 61,756,641               |
| Chr08                     | Hic_asm_7           | 118                    | 47,622,867               |
| Chr09                     | Hic_asm_8           | 62                     | 27,783,661               |
| Chr10                     | Hic_asm_9           | 69                     | 32,896,108               |
| Chr11                     | Hic_asm_10          | 82                     | 21,739,851               |
| Chr12                     | Hic_asm_11          | 29                     | 32,200,481               |
| Chr13                     | Hic_asm_12          | 42                     | 29,129,546               |
| Chr14                     | Hic_asm_13          | 56                     | 28,882,651               |
| Chr15                     | Hic_asm_14          | 232                    | 70,525,535               |
| Chr16                     | Hic_asm_15          | 195                    | 89,391,071               |
| Chr17                     | Hic_asm_16          | 193                    | 16,898,605               |
| Chr18                     | Hic_asm_17          | 54                     | 15,913,822               |
| Chr19                     | Hic_asm_18          | 68                     | 33,789,651               |
| Chr20                     | Hic_asm_19          | 190                    | 46,494,833               |
| Chr21                     | Hic_asm_20          | 100                    | 32,874,627               |
| Chr22                     | Hic_asm_21          | 96                     | 39,527,105               |
| Chr23                     | Hic_asm_22          | 101                    | 39,007,358               |

**Table s3. The annotation of repeated sequences in the *G. eckloni* genome using TRF, RepeatMasker and RepeatProteinMask.** Note that the total content was merged and redundancy was eliminated by each method.

| Type              | Repeat Size(bp) | % of genome |
|-------------------|-----------------|-------------|
| TRF               | 59,024,407      | 6.42        |
| RepeatMasker      | 420,920,632     | 45.82       |
| RepeatProteinMask | 63,100,708      | 6.87        |
| Total             | 437,590,862     | 47.63       |

**Table s4. Summary statistics of repeat annotation in *G. eckloni*.** Note that *De novo* + Repbase represent the result of RepeatMasker based on Repbase, RepeatModeler, RepeatScout, and LTR\_FINDER; TE proteins meant the result of RepeatProteinMask based on Repbase, and the Combined TEs refer to the combined results of *De novo* + Repbase and TE proteins.

| Type    | Denovo+Repbase |             | TE Proteins |             | Combined TEs |             |
|---------|----------------|-------------|-------------|-------------|--------------|-------------|
|         | Length (bp)    | % in genome | Length (bp) | % in genome | Length (bp)  | % in genome |
| DNA     | 43,441,654     | 4.73        | 4,297,129   | 0.47        | 44,941,543   | 4.89        |
| LINE    | 5,251,877      | 1.66        | 30,834,954  | 3.36        | 36,383,537   | 3.96        |
| SINE    | 2,370,900      | 0.26        | 0           | 0           | 2,370,900    | 0.26        |
| LTR     | 355,341,965    | 38.68       | 27,985,849  | 3.05        | 356,794,021  | 38.84       |
| Unknown | 11,690,176     | 1.27        | 0           | 0           | 11,690,176   | 1.27        |
| Total   | 420,920,632    | 45.82       | 63,100,708  | 6.87        | 425,012,609  | 46.26       |

**Table s5. The number of the annotated non-coding RNA in the *G. eckloni* genome.**

| Type  | Number   | Average length (bp) | Total length (bp) | % of genome |          |
|-------|----------|---------------------|-------------------|-------------|----------|
| miRNA | 1,717    | 116.58              | 200,168           | 0.021789    |          |
| tRNA  | 12,157   | 75.00               | 911,763           | 0.099247    |          |
| rRNA  | rRNA     | 1,780               | 178.65            | 317,991     | 0.034614 |
|       | 18S      | 207                 | 437.05            | 90,469      | 0.009848 |
|       | 28S      | 282                 | 346.36            | 97,674      | 0.010632 |
|       | 5.8S     | 55                  | 117.29            | 6,451       | 0.000702 |
|       | 5S       | 1,236               | 99.84             | 123,397     | 0.013432 |
| snRNA | snRNA    | 1,152               | 133.32            | 153,582     | 0.016718 |
|       | CD-box   | 172                 | 120.66            | 20,754      | 0.002259 |
|       | HACA-box | 107                 | 142.94            | 15,295      | 0.001665 |
|       | splicing | 826                 | 132.76            | 109,663     | 0.011937 |
|       | scaRNA   | 35                  | 179.94            | 6,298       | 0.000686 |
|       | Unknown  | 12                  | 131               | 1,572       | 0.000171 |

**Table s6. The comparison of the gene models annotated from the homolog species of *G. eckloni*.**

| Species                         | Gene number | Average length(bp) |          |        |          | Exons number per gene |
|---------------------------------|-------------|--------------------|----------|--------|----------|-----------------------|
|                                 |             | Transcript         | CDS      | Exon   | Intron   |                       |
| <i>Gymnocypris eckloni</i>      | 24,430      | 16,219.34          | 1,536.71 | 173.00 | 1,862.69 | 8.88                  |
| <i>Cyprinus carpio</i>          | 47,513      | 11,443.46          | 1,214.22 | 164.14 | 1,598.93 | 7.40                  |
| <i>Astyanax mexicanus</i>       | 22,631      | 20,200.93          | 1,574.58 | 162.81 | 2,148.02 | 9.67                  |
| <i>Danio rerio</i>              | 26,162      | 24,859.47          | 1,620.00 | 173.68 | 2,790.70 | 9.33                  |
| <i>Takifugu rubripes</i>        | 21,944      | 8,721.04           | 1,804.84 | 167.83 | 709.07   | 10.75                 |
| <i>Ctenopharyngodon idellus</i> | 32,659      | 10,458.83          | 1,389.10 | 181.01 | 1,358.97 | 7.67                  |
| <i>Oryzias latipes</i>          | 19,146      | 11,969.78          | 1,504.25 | 148.03 | 1,142.33 | 10.16                 |
| <i>Ictalurus punctatus</i>      | 22,494      | 17,637.62          | 1,753.46 | 171.17 | 1,718.35 | 10.24                 |

**Table s7. The number of genes with functional classifications in *G. eckloni*.**

| Database    | Number | Percent (%) |
|-------------|--------|-------------|
| SwissProt   | 20,432 | 83.60       |
| NR          | 23,110 | 94.60       |
| KEGG        | 20,593 | 84.30       |
| InterPro    | 21,539 | 88.20       |
| GO          | 15,281 | 62.60       |
| Pfam        | 19,290 | 79.00       |
| Annotated   | 23,157 | 94.80       |
| Unannotated | 1,273  | 5.20        |
| Total       | 24,430 | 94.80       |

**Table s8. Gene families among the 14 species.**

| Species              | Genes Number | Single-copy genes | Multiple-copy genes | Unique | Other  | Uncluster |
|----------------------|--------------|-------------------|---------------------|--------|--------|-----------|
| <i>G. eckloni</i>    | 24,428       | 1,396             | 4,358               | 576    | 1,4782 | 3,316     |
| <i>T. rubripes</i>   | 21,391       | 1,442             | 4,190               | 368    | 14,274 | 1,117     |
| <i>O. latipes</i>    | 22,107       | 1,443             | 4,286               | 298    | 14,858 | 1,222     |
| <i>C. carpio</i>     | 23,755       | 1,299             | 4,704               | 338    | 13,559 | 3,855     |
| <i>A. mexicanus</i>  | 18,684       | 1,580             | 3,569               | 231    | 12,238 | 1,066     |
| <i>C. idellus</i>    | 32,659       | 1,300             | 4,942               | 891    | 17,421 | 8,105     |
| <i>D. rerio</i>      | 25,357       | 1,270             | 4,957               | 865    | 17,167 | 1,098     |
| <i>I. punctatus</i>  | 23,599       | 1,333             | 4,674               | 390    | 15,774 | 1,428     |
| <i>O. niloticus</i>  | 28,149       | 1,347             | 4,815               | 1,294  | 19,416 | 1,277     |
| <i>H. sapiens</i>    | 20,155       | 1,652             | 3,141               | 503    | 14,061 | 798       |
| <i>M. musculus</i>   | 22,312       | 1,681             | 3,063               | 1,916  | 14,730 | 922       |
| <i>G. gallus</i>     | 16,628       | 1,748             | 2,646               | 587    | 10,621 | 1,026     |
| <i>X. tropicalis</i> | 17,204       | 1,828             | 2,659               | 1,007  | 10,709 | 1,001     |
| <i>P. marinus</i>    | 10,127       | 2,187             | 1,404               | 388    | 4,234  | 1,914     |

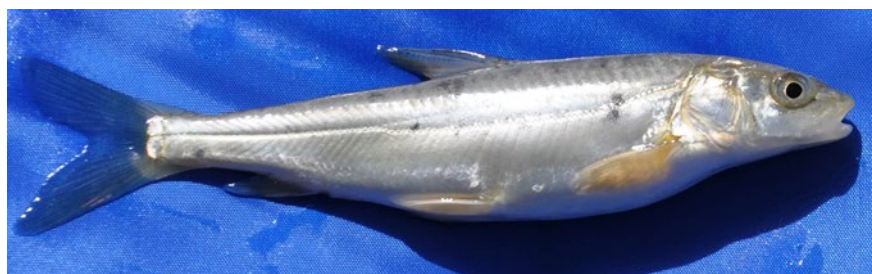

**Fig. s1. A picture of *G. eckloni* used in the genome sequencing and assembly.**
